# Supplementary material
Source: PubMed Central journal article supplement (PMC9618164)
Supplement: jiang_mondal_hmg_supplement_12172021_ddac013.pdf [file jiang_mondal_hmg_supplement_12172021_ddac013.pdf]

**Multi-omics analyses reveal early metabolic imbalance and mitochondrial stress in neonatal photoreceptors leading to cell death in *Pde6b*<sup>rd1/rd1</sup> mouse model of retinal degeneration**

## **CONTENTS**

Supplementary figures

Supplementary data legends

# Supplementary Figure 1

**A**
**Pathway enrichment of Differentially Expressing genes (KEGG)**
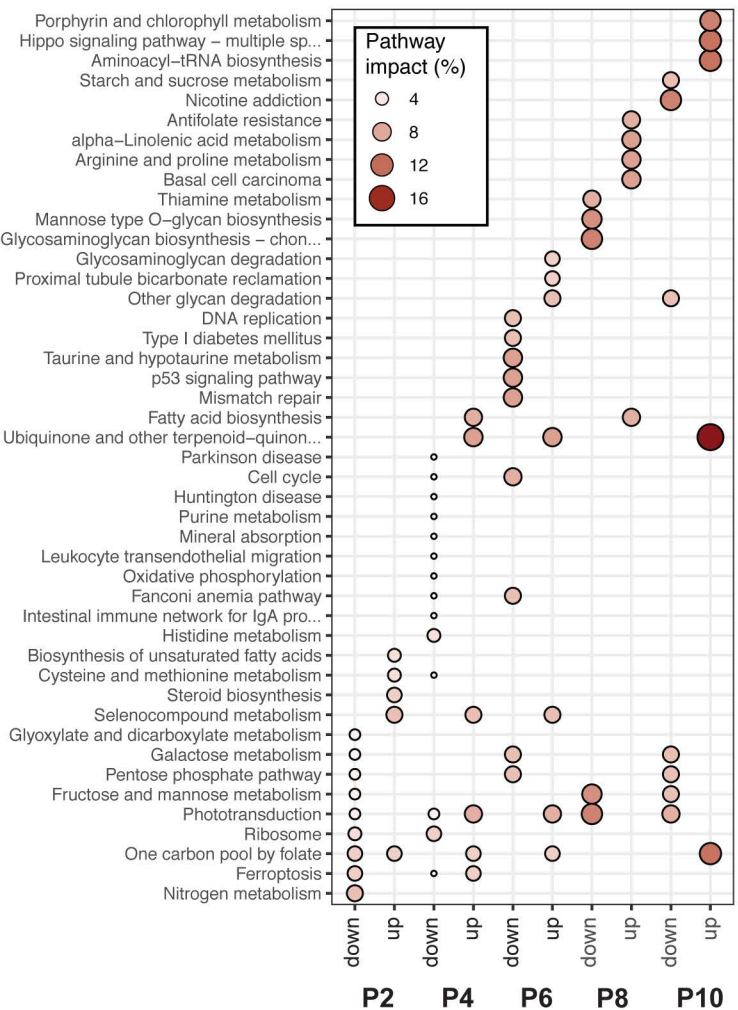
**B**
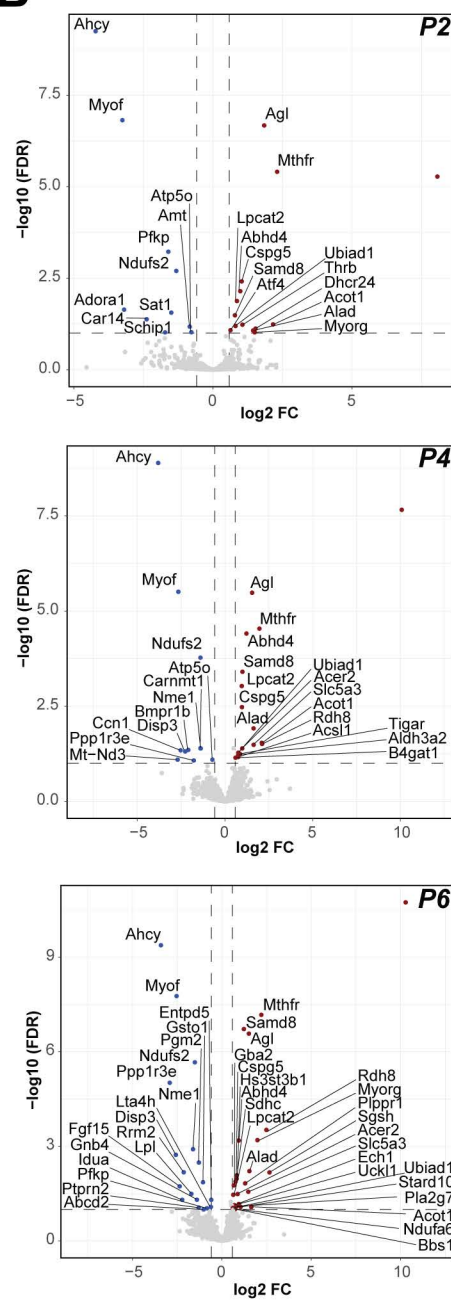
**C**
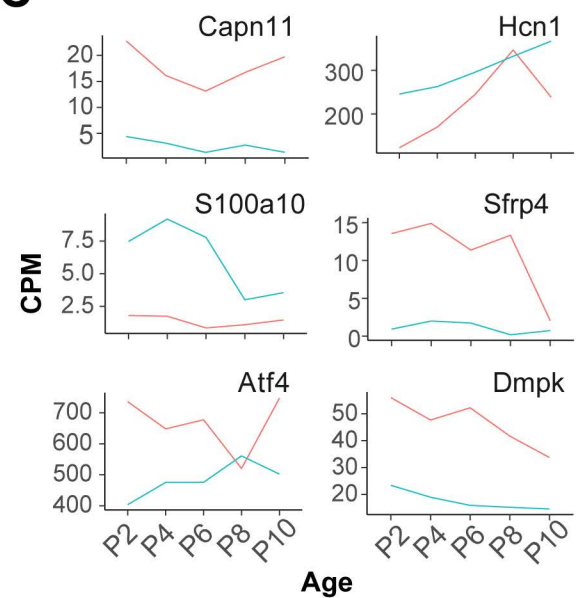
**D**
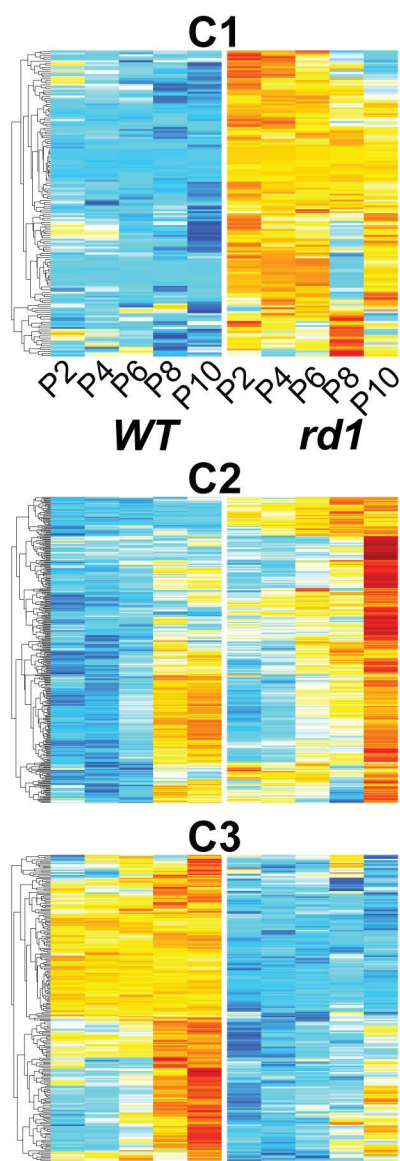
**E**
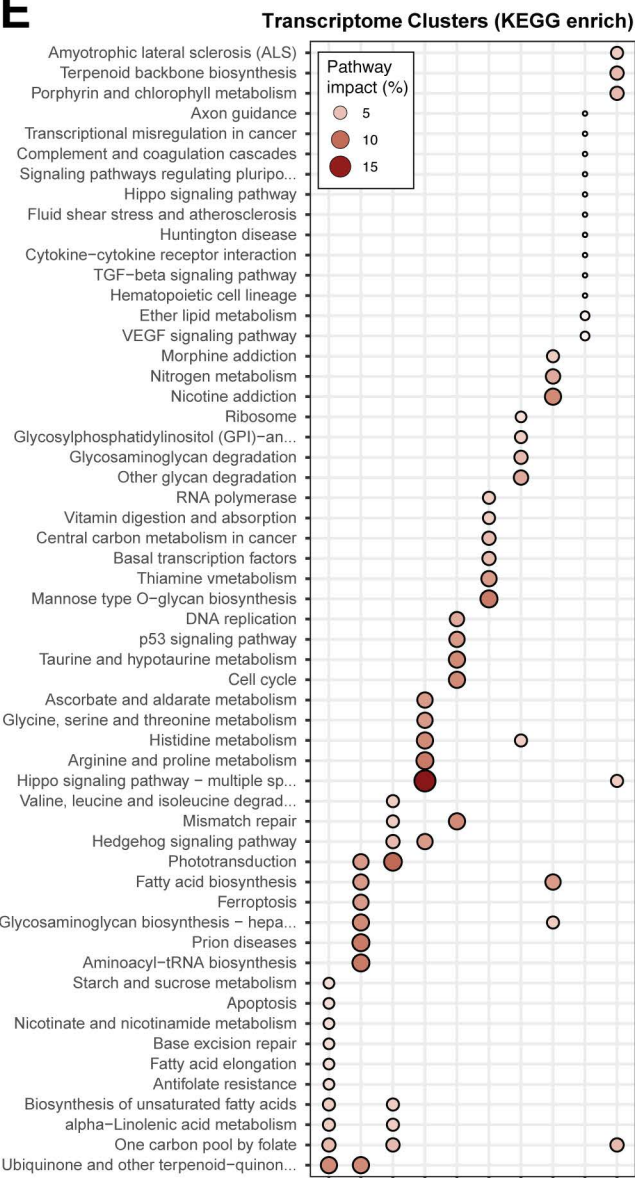

**Supplementary Figure 1. Differential gene expression in *rd1* rod photoreceptors at pre-degeneration stages.**

- A. Enrichment plot of top 10 KEGG pathways that are most impacted by differential gene expression at pre-degeneration stages in *rd1* rods.
- B. Volcano plots of metabolic genes (as annotated in Reactome) at P2, P4, and P6. Colors represent significance and direction of differential expression (*rd1* vs *WT*): red – significantly over-expressed; blue – significantly under-expressed; and, grey – not significant.
- C. Calcium-related and signaling genes show divergent expression in *rd1* rod photoreceptors at neonatal stages. Red and blue lines denote gene expression in *rd1* and *WT* rod photoreceptors, respectively.
- D. Heatmaps of selected clusters - C1, C2 and C3, showing atypical gene expression trends between *rd1* and *WT* rods. Log CPM (lcpm) values are row scaled to z-scores for plotting. Color scale bar is same as in Figure 1D.
- E. Pathway annotation (KEGG) of clusters of differentially expressed genes between rod photoreceptors from *rd1* and *WT* retina. The dot plot shows the top 10 most impacted pathways per cluster.



# Supplementary Figure 2

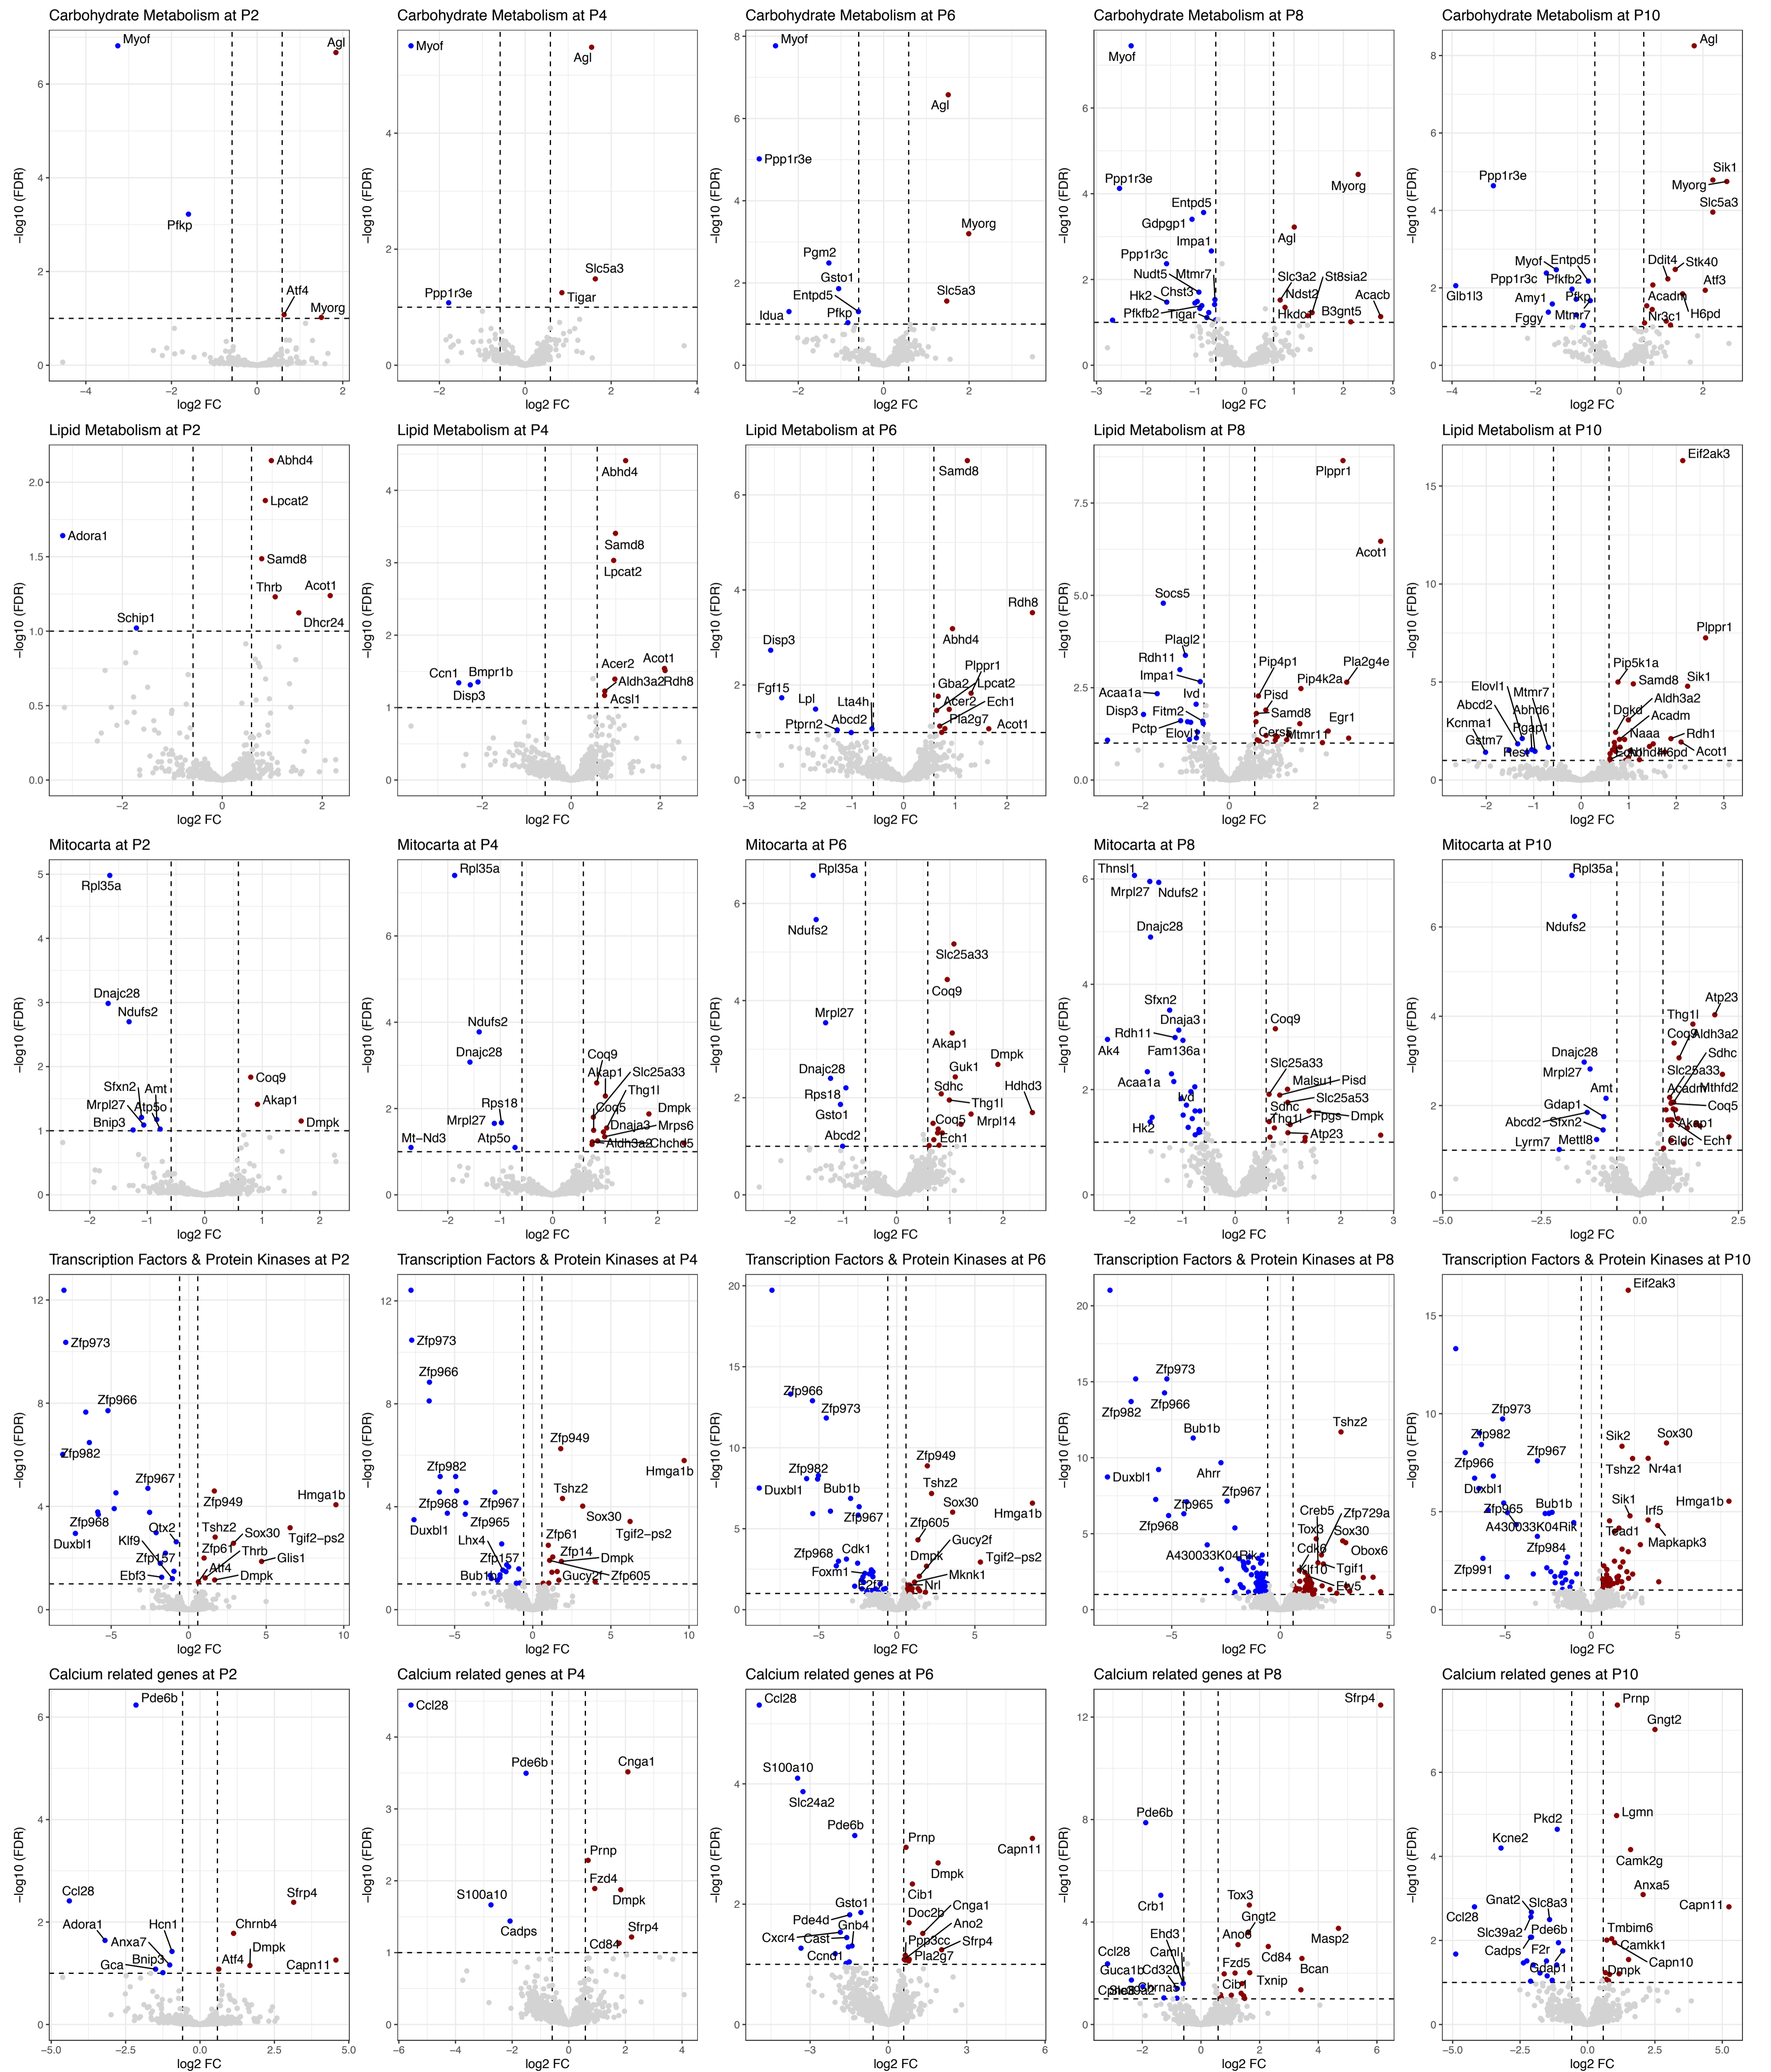

**Supplementary Figure 2. Transcriptional deregulation in selected pathways before rod photoreceptor degeneration in the *rd1* retina.** Volcano plots summarizing differential expression of selected pathways – Carbohydrate metabolism, lipid metabolism, mitochondria, transcription factors and protein kinases, and calcium related genes, at P2, P4, P6, P8 and P10, in rod photoreceptors from *rd1* retina before degeneration. Colors represent significance and direction of differential expression (*rd1* vs *WT*): red – significantly over-expressed; blue – significantly under-expressed; and, grey – not significant.

# Supplementary Figure 3

## A

### Top overexpressed proteins (P6)

| Symbol  | Description                  | FC     |
|---------|------------------------------|--------|
| CAR8    | Carbonic anhydrase 8         | 100    |
| HDDC3   | HD domain containing 3       | 14.322 |
| CD99L2  | CD99 antigen-like 2          | 12.285 |
| ACOT1   | Acyl-CoA thioesterase 1      | 5.19   |
| SUPV3L1 | Suppressor of var1, 3-like 1 | 4.98   |

### Top overexpressed proteins (P10)

| Symbol  | Description                                           | FC     |
|---------|-------------------------------------------------------|--------|
| HDDC3   | HD domain containing 3                                | 15.838 |
| CD99L2  | CD99 antigen-like 2                                   | 6.042  |
| ACOT1   | Acyl-CoA thioesterase 1                               | 4.416  |
| SUPV3L1 | Suppressor of var1, 3-like 1 ( <i>S. cerevisiae</i> ) | 3.137  |
| RNF146  | Ring finger protein 146                               | 2.999  |

### Top underexpressed proteins (P6)

| Symbol | Description                                    | FC    |
|--------|------------------------------------------------|-------|
| AMY2A5 | Amylase 2a5                                    | 0.055 |
| CALM1  | Calmodulin 1                                   | 0.127 |
| PDE6B  | Phosphodiesterase 6B, cGMP-specific, rod, beta | 0.138 |
| AQP4   | Aquaporin 4                                    | 0.219 |
| CRYAA  | Crystallin, alpha A                            | 0.228 |

### Top underexpressed proteins (P10)

| Symbol | Description                                     | FC    |
|--------|-------------------------------------------------|-------|
| PDE6B  | Phosphodiesterase 6B, cGMP-specific, rod, beta  | 0.041 |
| AMY2A5 | Amylase 2a5                                     | 0.089 |
| PDE6A  | Phosphodiesterase 6A, cGMP-specific, rod, alpha | 0.135 |
| CRYGS  | Crystallin, gamma S                             | 0.284 |
| RAB33B | RAB33B, member RAS oncogene family              | 0.293 |

## B

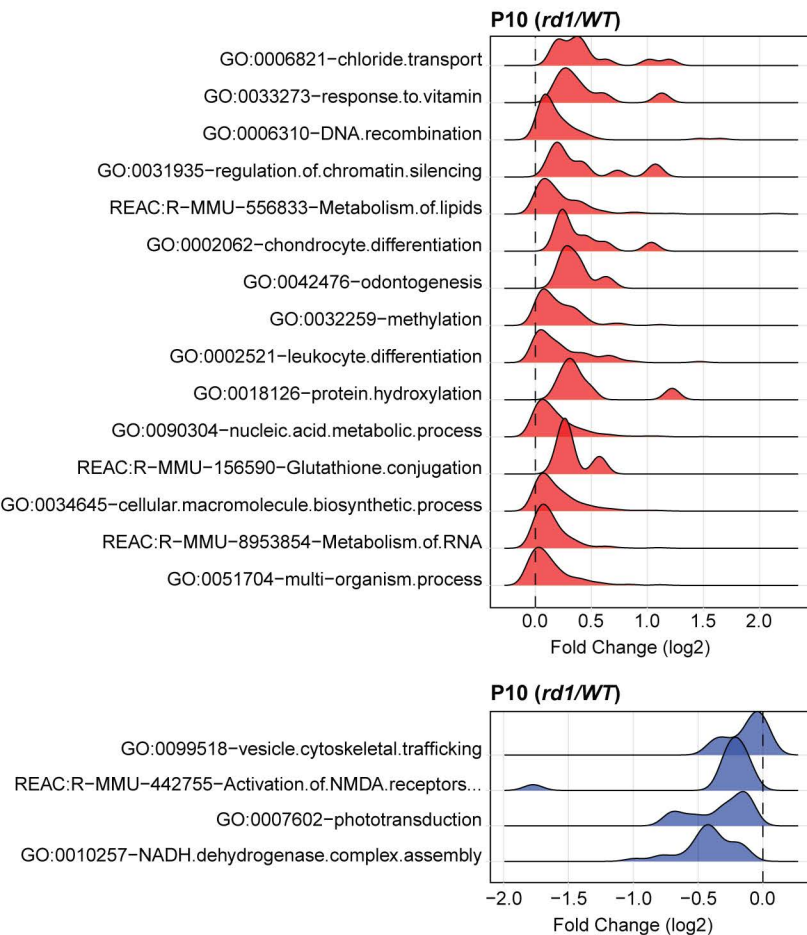

## C

### P6 Oxidative Phosphorylation NES = -1.48; p < 0.1

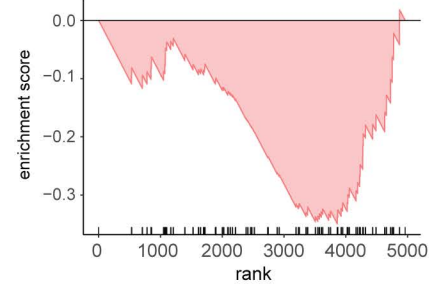

### P10 Oxidative Phosphorylation NES = -3.94; p = 5.6e-105

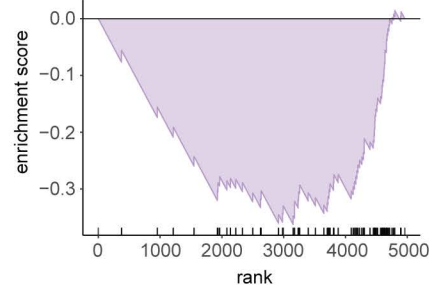

## D

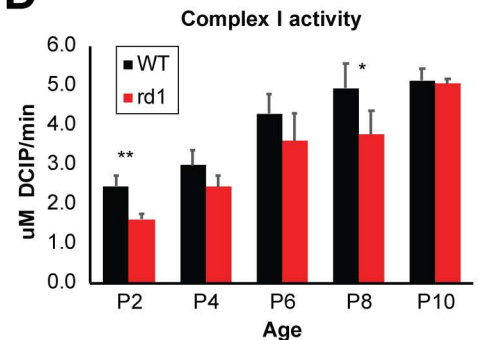

**Supplementary Figure 3. Proteomic changes in the *rd1* retina and decreased activity of mitochondrial NADH-dehydrogenase complex (Complex I).**

- A. A list of the top five over- and under-expressing proteins at P6 and P10 in the *rd1* retina.
- B. Ridge-plots of significantly differential pathways at P10 from gene set enrichment analysis. The top (red fill) and bottom (blue fill) panels represent over- and under-enriched pathways, respectively. Each ridge shows distribution of fold change of leading-edge proteins of the respective significant pathway.
- C. Enrichment curve from *fgsea* analysis for a curated list of OXPHOS proteins in *rd1* vs *WT* retina at P6 and P10, respectively.
- D. Reduced Complex I activity in the *rd1* retina before photoreceptor degeneration. Complex I activity assayed in mitochondrial enriched *WT* and *rd1* retinal lysates, n=3 or 4 for each group. Data are represented as mean  $\pm$  SEM. Student t test, \*  $p < 0.05$ , \*\*  $p < 0.01$ .

# Supplementary Figure 4

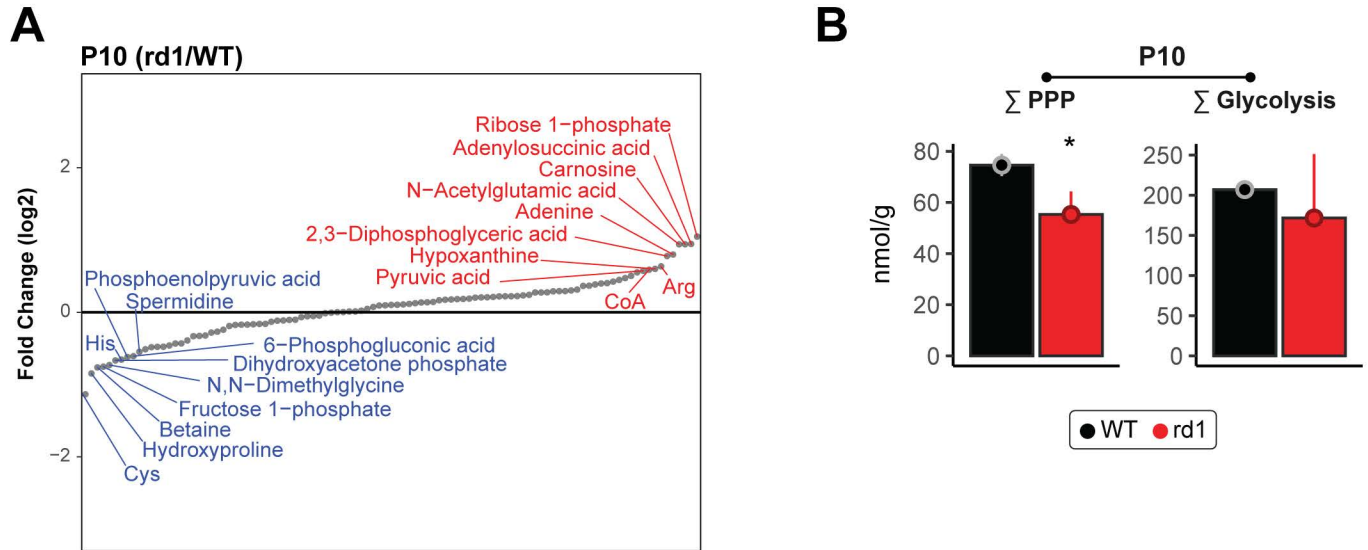



**Supplementary Figure 4. Aberrant flux in central carbon metabolism continues at P10.**

- A. Plot showing metabolite abundance profiles of the *rd1* retina relative to *WT*, at P10. Red labels denote top abundant metabolites in the *rd1* retina, while blue labels denote most depleted metabolites.
- B. Sum of metabolites involved in glycolysis and PPP in the *WT* and *rd1* retina at P10. Color and significance features are same as Figure 4C.

# Supplementary Figure 5

Mit/Nu DNA ratio

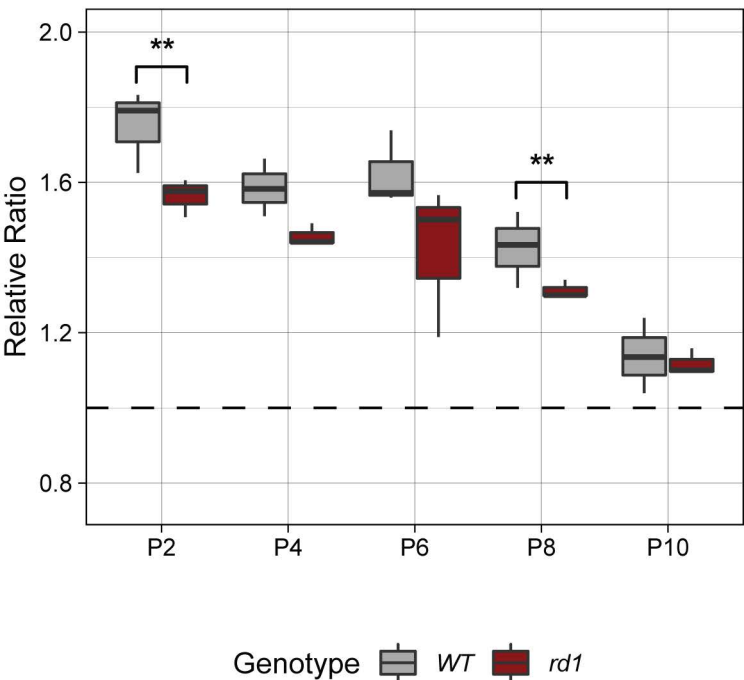

**Supplementary Figure 5. Lower Mit/Nu DNA ratio in *rd1* retinas.** Mit/Nu DNA ratio was measured in *WT* and *rd1* retinas from P2 to P10. Student t test, \*\*  $p < 0.01$ .



TEM of *rd1* retina showing ONL, Outer segment and RPE

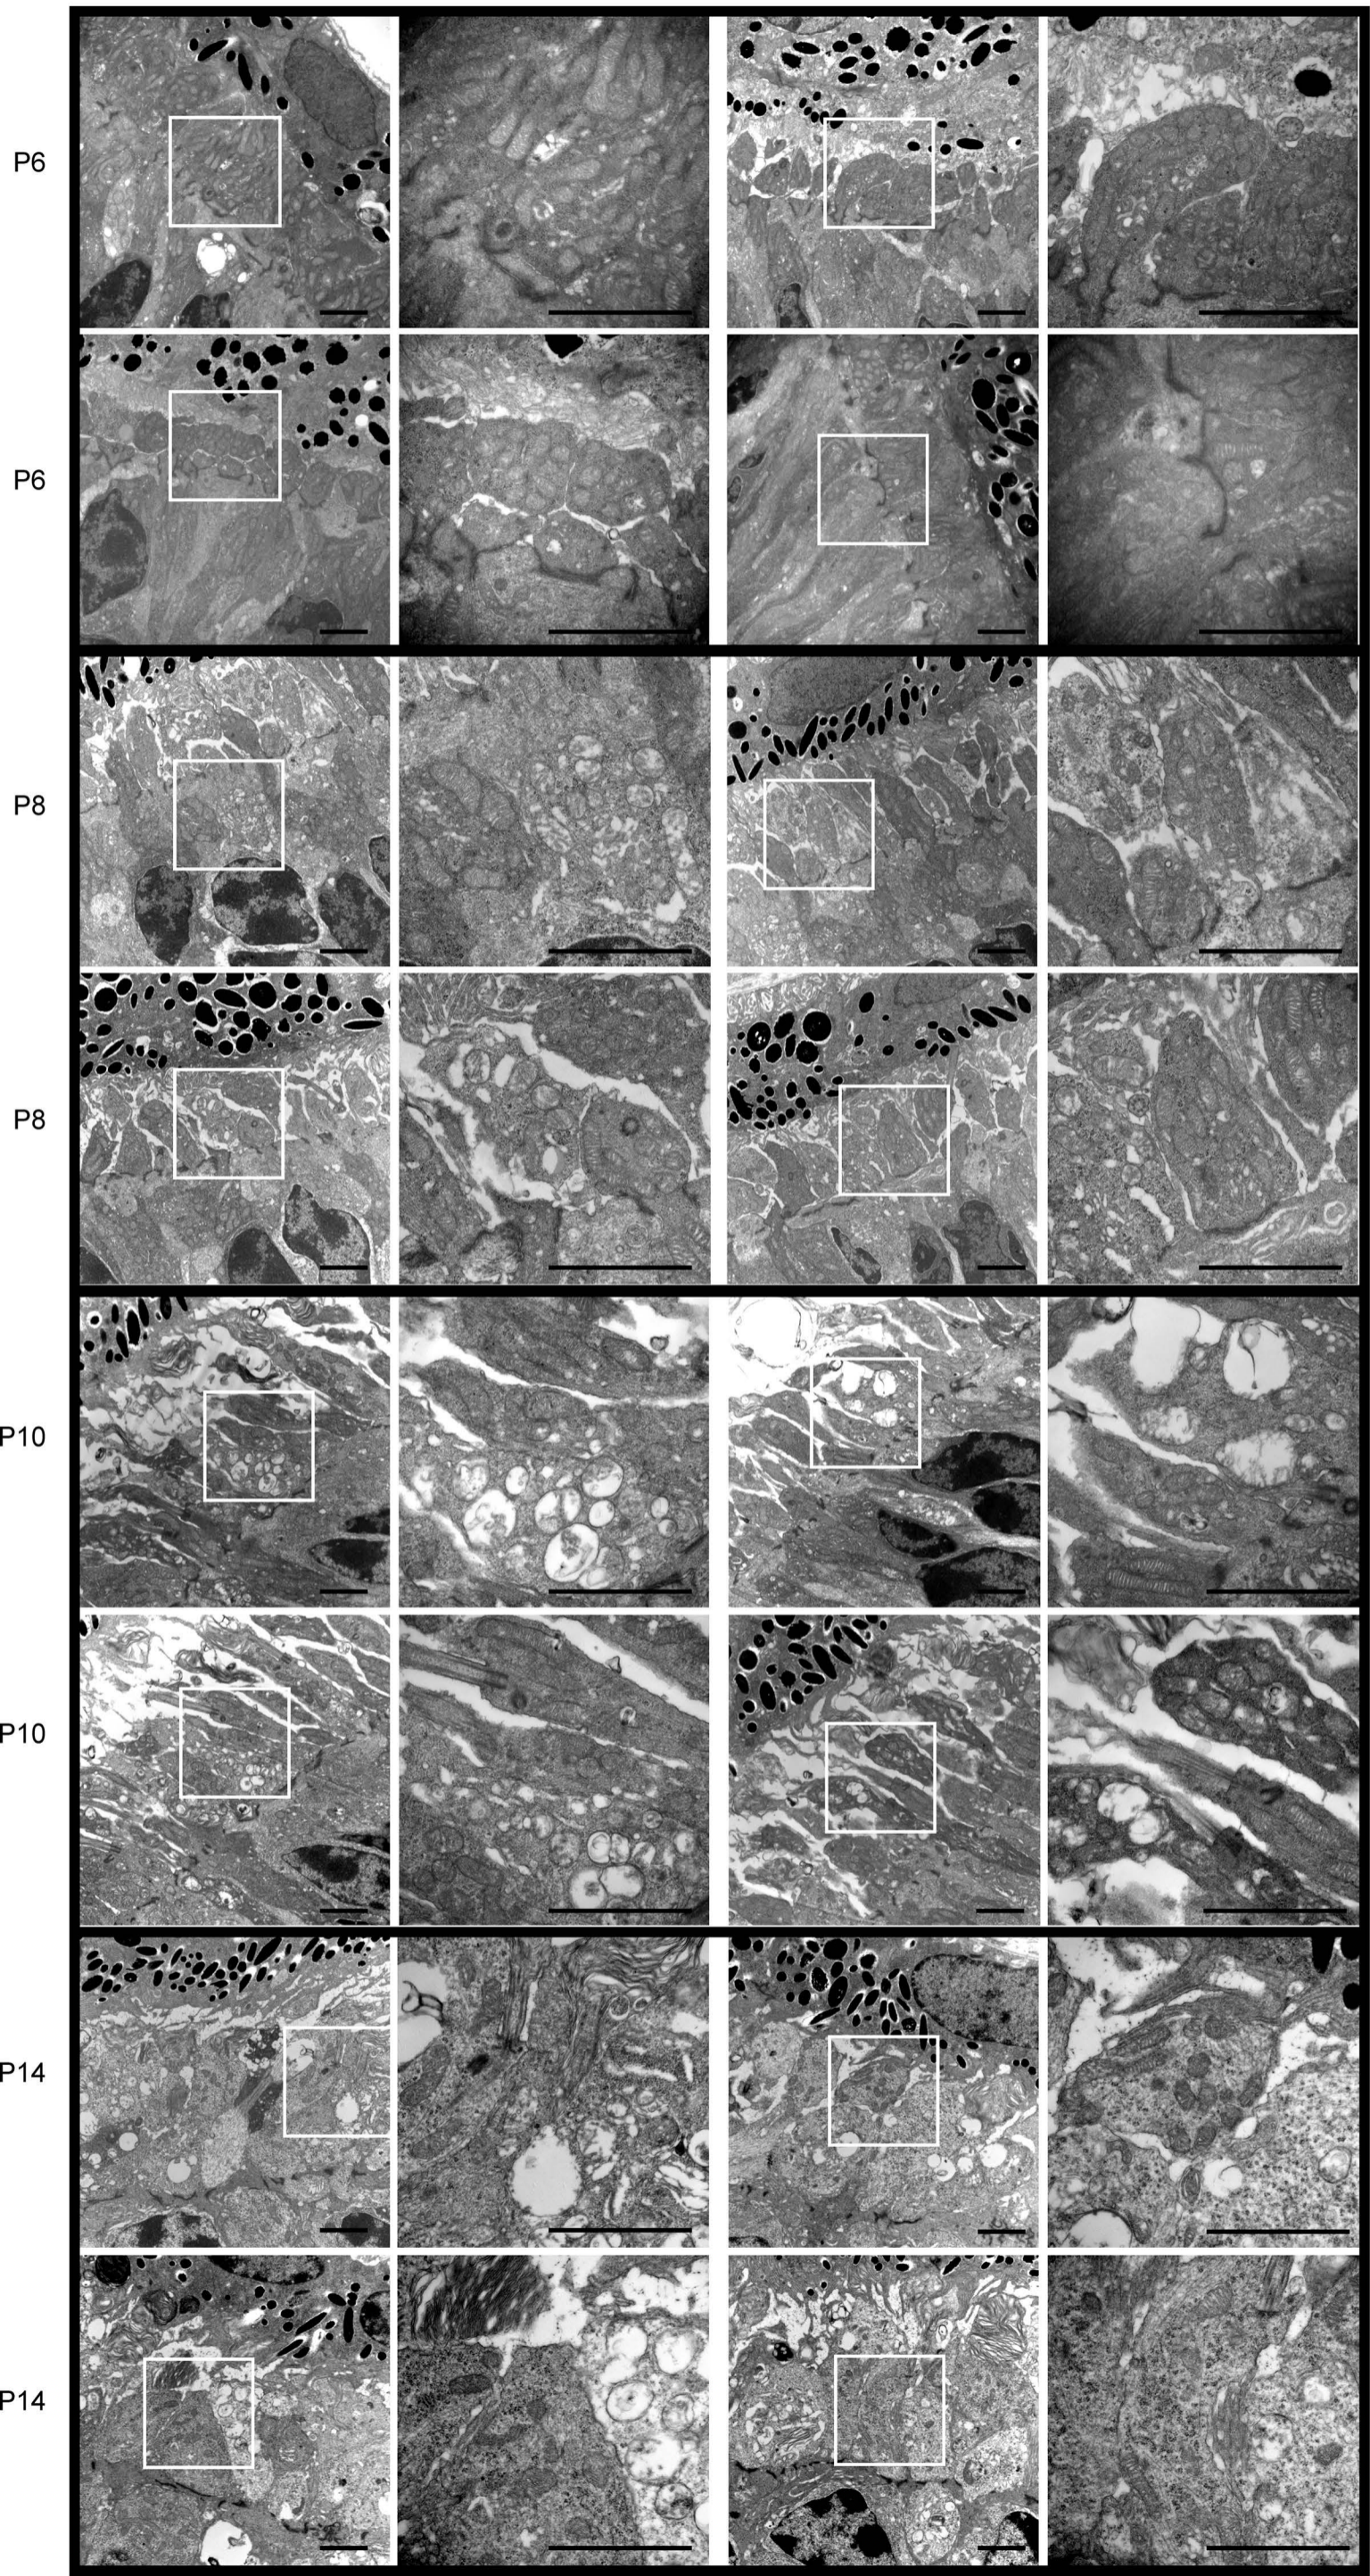



**Supplementary Figure 6. TEM ultrastructure assessment of photoreceptor inner segments and mitochondria in *rd1* photoreceptors from P6 to P14.** Photographs were taken at 10,000X and 30,000X. White square box indicates zoomed in area. Scale bar = 2 mm.



## **SUPPLEMENTARY DATA LEGENDS**

**Supplementary Data 1. Gene expression quantification of flow sorted rod photoreceptors from *WT* and *rd1* retina.** RNAseq summary in counts per million (CPM) and statistical test results for significantly differentially expressed genes between flow sorted rod photoreceptors from *WT* and *rd1* retina.

**Supplementary Data 2. Proteomic quantitation and differential analysis of *WT* and *rd1* retina.** Peptide detection summary and abundance ratio for retinal proteins detected in the mass spectrometry experiment.

**Supplementary Data 3. Retinal metabolome landscape in *WT* and *rd1*.** Summary of comparative analysis of metabolomic profiles from *WT* and *rd1* retina.
